# Supplementary material for: Efficient separation of ethylene from acetylene/ethylene mixtures by a flexible-robust metal–organic framework
Source: Royal Society of Chemistry journal article supplement (doi:10.1039/c7ta05598f), 2017-01-01
Supplement: c7ta05598f1.pdf [file c7ta05598f1.pdf]

## *Supporting Information*

### **Efficient separation of ethylene from acetylene/ethylene mixtures by a flexible-robust metal-organic framework**

Libo Li,<sup>a,b,e</sup> Rui-Biao Lin,<sup>b</sup> Rajamani Krishna,<sup>c</sup> Xiaoqing Wang,<sup>a,e</sup> Bin Li,<sup>b</sup> Hui Wu,<sup>d</sup> Jinping Li,<sup>a,e,\*</sup> Wei Zhou,<sup>d,\*</sup> and Banglin Chen<sup>b,\*</sup>

<sup>a</sup>College of Chemistry and Chemical Engineering, Taiyuan University of Technology, Taiyuan 030024, Shanxi, P. R. China

<sup>b</sup>Department of Chemistry, University of Texas at San Antonio, One UTSA Circle, San Antonio, TX 78249-0698, United States

<sup>c</sup>Van 't Hoff Institute for Molecular Sciences, University of Amsterdam, Science Park 904, 1098 XH Amsterdam, The Netherlands

<sup>d</sup>NIST Center for Neutron Research, National Institute of Standards and Technology, Gaithersburg, MD 20899-6102, United States

<sup>e</sup>Shanxi Key Laboratory of Gas Energy Efficient and Clean Utilization, Taiyuan 030024, Shanxi, P. R. China

### Table of Contents

|                                                                                                         |    |
|---------------------------------------------------------------------------------------------------------|----|
| 1. Experimental section .....                                                                           | 2  |
| 1.1 Synthesis and characterization of ELM-12 .....                                                      | 2  |
| 1.2 Breakthrough experiments .....                                                                      | 3  |
| 2. Calculation of the separation potential of ELM-12.....                                               | 4  |
| 2.1 Fitting of pure component isotherms .....                                                           | 4  |
| 2.2 IAST calculations of adsorption selectivities.....                                                  | 5  |
| 3. Breakthrough curves for C <sub>2</sub> H <sub>2</sub> /C <sub>2</sub> H <sub>4</sub> separation..... | 7  |
| 4. Adsorption cycling experiments for ELM-12 .....                                                      | 8  |
| 5. Separation cycling experiments for ELM-12 .....                                                      | 9  |
| 6. Structural stability experiments for ELM-12 .....                                                    | 10 |

# 1. Experimental section

## 1.1 Synthesis and characterization of ELM-12

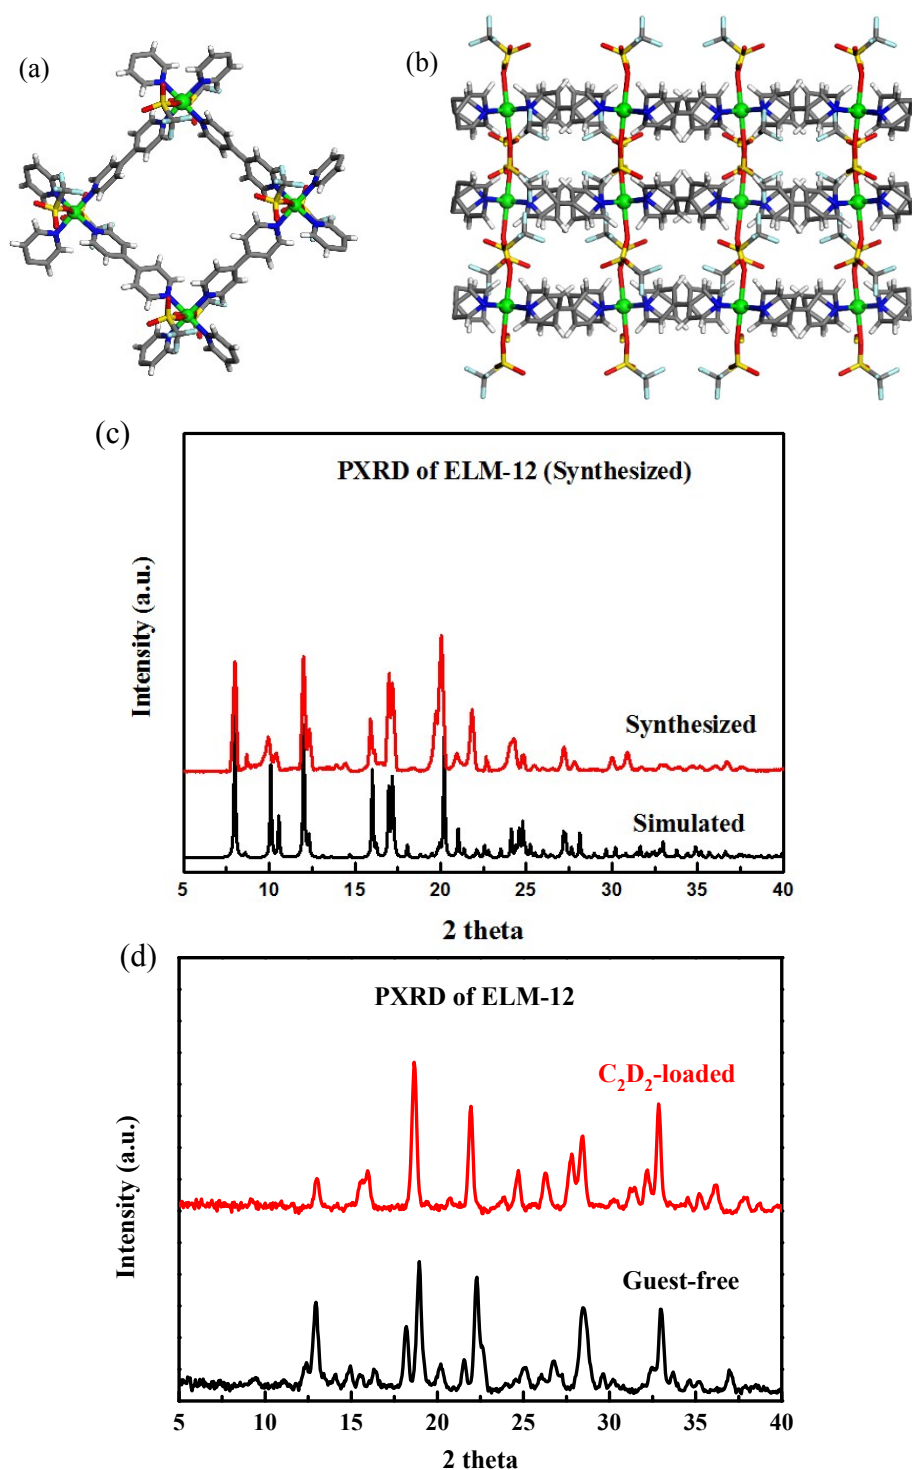

**Fig S1.** (a, b) Schematic diagram of the structure of ELM-12. (c) Powder X-ray diffraction (PXRD) patterns of synthesized ELM-12 sample. (d) PXRD patterns of guest-free and  $C_2D_2$ -loaded ELM-12 samples. (Cu, green; C, gray; O, red; H, white; S, yellow; F, blue).

## 1.2 Breakthrough experiments

The breakthrough curves were measured on a homemade apparatus for gases mixtures  $C_2H_2/C_2H_4$  (1/99 and 50/50) at 298 K and 1 bar. The gas flows were controlled at the inlet by a mass flow meter as 2 mL/min, and a gas chromatograph (TCD-Thermal Conductivity Detector) continuously monitored the effluent gas from the adsorption bed. Prior to every breakthrough experiment, we activated the sample by flushing the adsorption bed with helium gas for 2 hours at 373 K. Subsequently, the column was allowed to equilibrate at the measurement rate before we switched the gas flow.

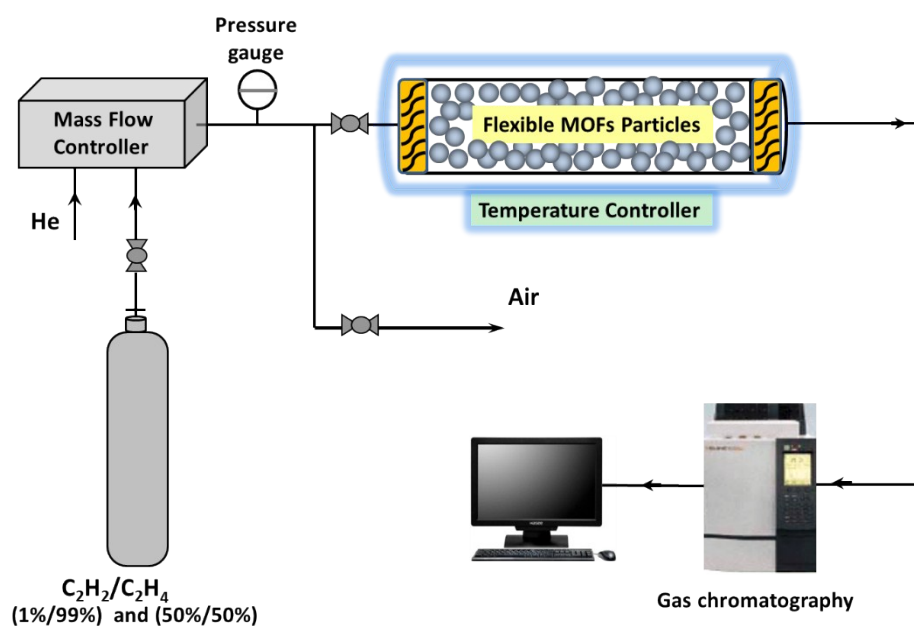

**Fig. S2** Breakthrough experiment apparatus.

## 2. Calculation of the separation potential of ELM-12

### 2.1 Fitting of pure component isotherms

The experimentally measured excess loadings for C<sub>2</sub>H<sub>2</sub> and C<sub>2</sub>H<sub>4</sub> at temperatures of 273 and 298 K for ELM-12 were fitted with the dual-Langmuir-Freundlich isotherm model

$$q = q_{A,sat} \frac{b_A p^{v_A}}{1 + b_A p^{v_A}} + q_{B,sat} \frac{b_B p^{v_B}}{1 + b_B p^{v_B}} \quad (1)$$

with  $T$ -dependent parameters  $b_A$ , and  $b_B$

$$b_A = b_{A0} \exp\left(\frac{E_A}{RT}\right); \quad b_B = b_{B0} \exp\left(\frac{E_B}{RT}\right) \quad (2)$$

The parameters are provided in table S1.

For all other MOFs, the isotherm data are taken from Cui et al.<sup>1</sup>

|                               | Site A                  |                                 |                         |               | Site B                  |                                 |                         |               |
|-------------------------------|-------------------------|---------------------------------|-------------------------|---------------|-------------------------|---------------------------------|-------------------------|---------------|
|                               | $q_{A,sat}$             | $b_{A0}$                        | $E_A$                   | $v_A$         | $q_{B,sat}$             | $b_{B0}$                        | $E_B$                   | $v_B$         |
|                               | mol<br>kg <sup>-1</sup> | Pa <sup>-<math>v_i</math></sup> | kJ<br>mol <sup>-1</sup> | dimensionless | mol<br>kg <sup>-1</sup> | Pa <sup>-<math>v_i</math></sup> | kJ<br>mol <sup>-1</sup> | dimensionless |
| C <sub>2</sub> H <sub>2</sub> | 0.65                    | 8.7×10 <sup>-6</sup>            | 4.5                     | 1.36          | 2.5                     | 1.87×10 <sup>-9</sup>           | 24.6                    | 1             |
| C <sub>2</sub> H <sub>4</sub> | 1.45                    | 1.54×10 <sup>-8</sup>           | 18                      | 1             |                         |                                 |                         |               |

**Table S1.** Dual-Langmuir-Freundlich fitting parameters for C<sub>2</sub>H<sub>2</sub> and C<sub>2</sub>H<sub>4</sub> isotherms.

### Reference

[1] X. Cui, K. Chen, H. Xing, Q. Yang, R. Krishna, Z. Bao, H. Wu, W. Zhou, X. Dong, Y. Han, B. Li, Q. Ren, M. J. Zaworotko, B. Chen, *Science*, **2016**, 353, 141-144.

## 2.2 IAST calculations of adsorption selectivities

We consider the separation of binary  $C_2H_2/C_2H_4$  mixtures. The adsorption selectivity for  $C_2H_2/C_2H_4$  separation is defined by

$$S_{ads} = \frac{q_1/q_2}{p_1/p_2} \quad (3)$$

$q_1$ , and  $q_2$  are the molar loadings in the adsorbed phase in equilibrium with the bulk gas phase with partial pressures  $p_1$ , and  $p_2$ .

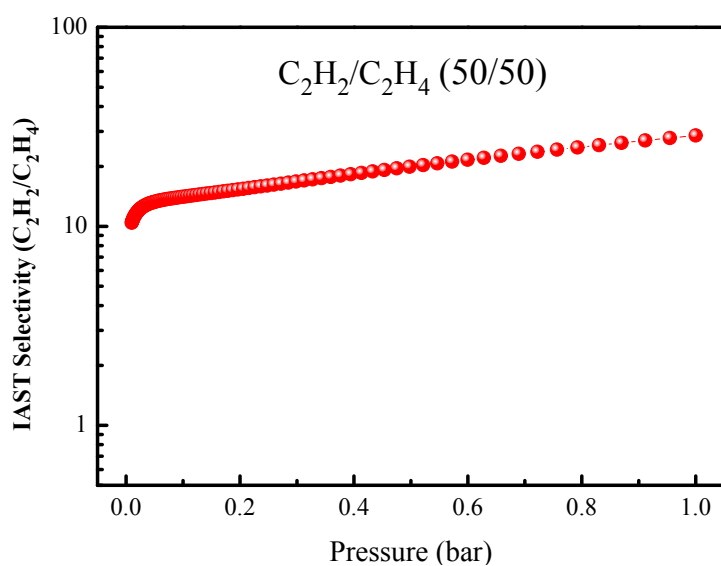

**Fig. S3** IAST calculations of the adsorption selectivity of  $C_2H_2/C_2H_4$  (50/50) mixtures on ELM-12.

## Notation

|                 |                                                                                             |
|-----------------|---------------------------------------------------------------------------------------------|
| $b_A$           | Langmuir-Freundlich constant for species $i$ at adsorption site A, $\text{Pa}^{-V_{iA}}$    |
| $b_B$           | Langmuir-Freundlich constant for species $i$ at adsorption site B, $\text{Pa}^{-V_{iB}}$    |
| $c_i$           | molar concentration of species $i$ in gas mixture, $\text{mol m}^{-3}$                      |
| $c_{i0}$        | molar concentration of species $i$ in gas mixture at inlet to adsorber, $\text{mol m}^{-3}$ |
| $E$             | energy parameter, $\text{J mol}^{-1}$                                                       |
| $L$             | length of packed bed adsorber, m                                                            |
| $p_i$           | partial pressure of species $i$ in mixture, Pa                                              |
| $p_t$           | total system pressure, Pa                                                                   |
| $q_i$           | component molar loading of species $i$ , $\text{mol kg}^{-1}$                               |
| $Q_{\text{st}}$ | isosteric heat of adsorption, $\text{J mol}^{-1}$                                           |
| $t$             | time, s                                                                                     |
| $T$             | absolute temperature, K                                                                     |
| $u$             | superficial gas velocity in packed bed, $\text{m s}^{-1}$                                   |

### *Greek letters*

|               |                                       |
|---------------|---------------------------------------|
| $\varepsilon$ | voidage of packed bed, dimensionless  |
| $\nu$         | Freundlich exponent, dimensionless    |
| $\rho$        | framework density, $\text{kg m}^{-3}$ |
| $\tau$        | time, dimensionless                   |

### 3. Breakthrough curves for C<sub>2</sub>H<sub>2</sub>/C<sub>2</sub>H<sub>4</sub> separation

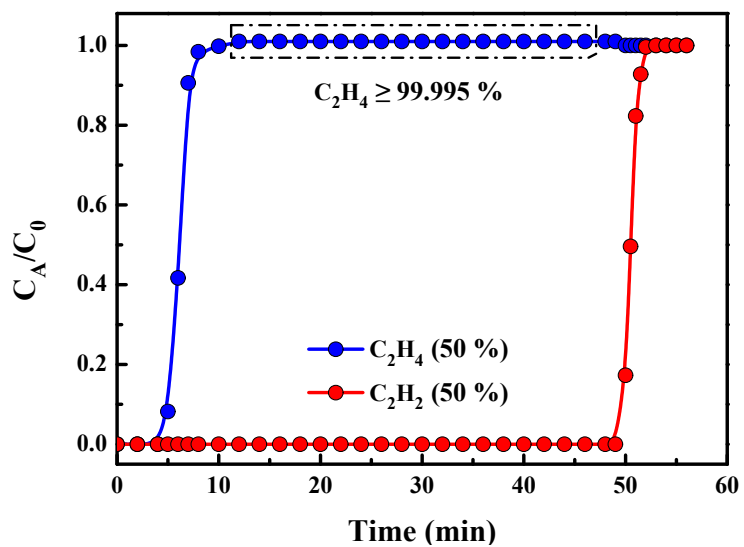

**Fig. S4** Experimental breakthrough curves of C<sub>2</sub>H<sub>2</sub>/C<sub>2</sub>H<sub>4</sub> (50/50) mixtures separation for ELM-12 materials at 298 K and 1 bar.

#### 4. Adsorption cycling experiments for ELM-12

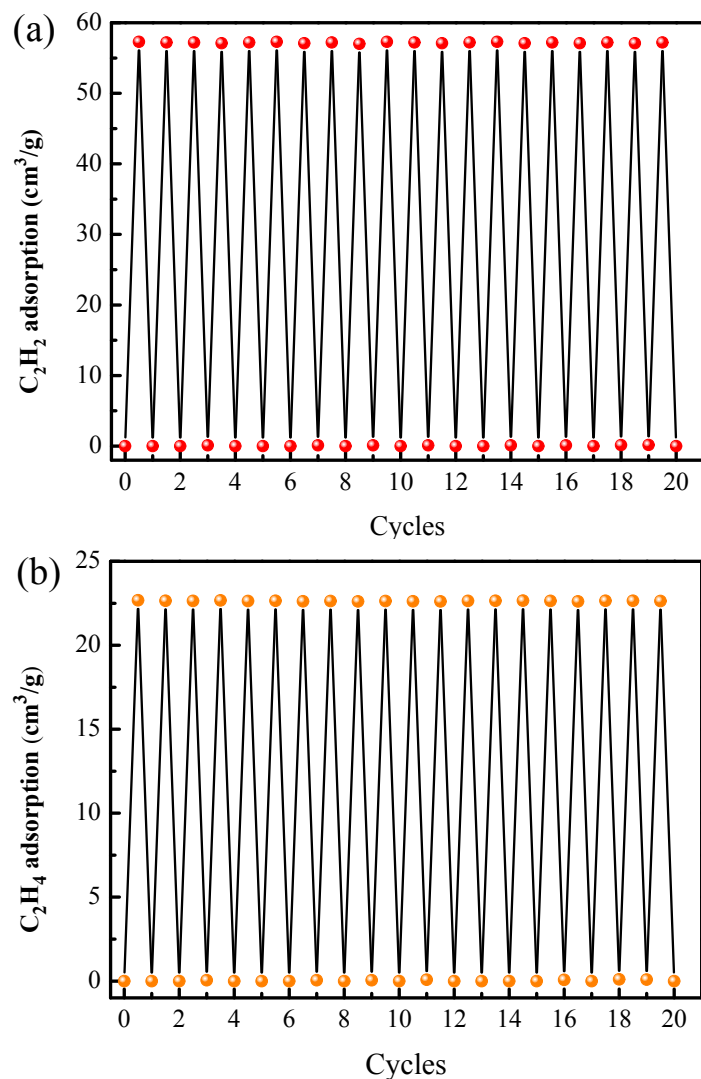

**Fig. S5**  $\text{C}_2\text{H}_2$  (a) and  $\text{C}_2\text{H}_4$  (b) adsorption cycles for ELM-12. After each adsorption process, sample was evacuated under  $10^{-6}$  bar for 30 minutes.



## 5. Separation cycling experiments for ELM-12

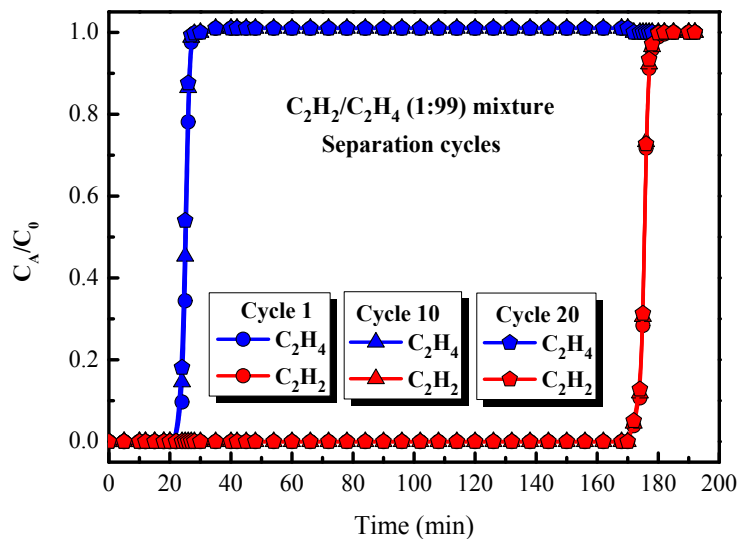

**Fig. S6 (a)** Cycling column breakthrough curves of  $C_2H_2/C_2H_4$  separation (1/99) for ELM-12 at 298 K and 1 bar. The breakthrough experiments were carried out at a flow rate of 2 mL/min. Regeneration with He flow (100 mL/min) for 30 minutes at 373 K.

## 6. Structural stability experiments for ELM-12

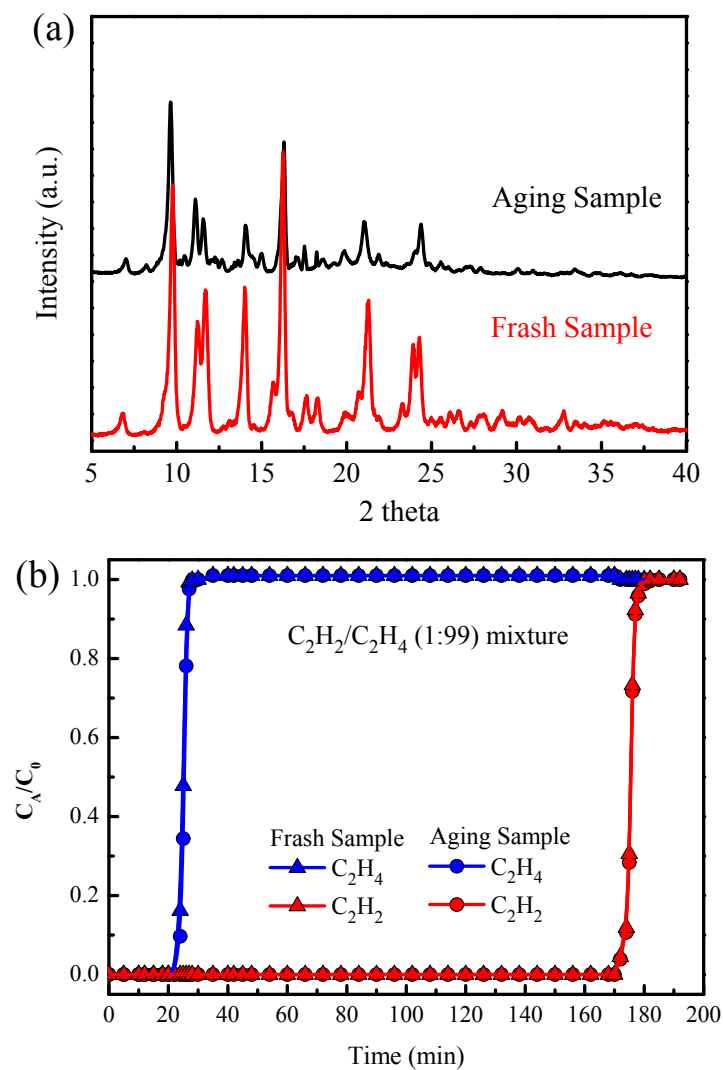

**Fig. S7** (a) PXR D and (b) breakthrough experiment of  $C_2H_2/C_2H_4$  (1/99) mixture for ELM-12 samples (fresh sample and two-years aging sample), respectively.

| Crystal data                               | ELM-12 (Guest-free) <sup>#</sup>                                                              | ELM-12 (C <sub>2</sub> D <sub>2</sub> )                                                                            |
|--------------------------------------------|-----------------------------------------------------------------------------------------------|--------------------------------------------------------------------------------------------------------------------|
| system                                     | monoclinic                                                                                    | monoclinic                                                                                                         |
| space group                                | C2/c                                                                                          | C2/c                                                                                                               |
| MF                                         | C <sub>22</sub> H <sub>16</sub> CuF <sub>6</sub> N <sub>4</sub> O <sub>6</sub> S <sub>2</sub> | C <sub>24.43</sub> H <sub>16</sub> CuD <sub>2.43</sub> F <sub>6</sub> N <sub>4</sub> O <sub>6</sub> S <sub>2</sub> |
| FW                                         | 674.05                                                                                        | 708.19                                                                                                             |
| a/Å                                        | 27.080                                                                                        | 27.315                                                                                                             |
| b/Å                                        | 15.096                                                                                        | 14.930                                                                                                             |
| c/Å                                        | 16.136                                                                                        | 16.516                                                                                                             |
| α/°                                        | 90.00                                                                                         | 90.00                                                                                                              |
| β/°                                        | 111.344                                                                                       | 110.786                                                                                                            |
| γ/°                                        | 90.00                                                                                         | 90.00                                                                                                              |
| volume/Å <sup>3</sup>                      | 6144                                                                                          | 6296.8                                                                                                             |
| Z                                          | 8                                                                                             | 8                                                                                                                  |
| density/g/cm <sup>3</sup>                  | 1.457                                                                                         | 1.422                                                                                                              |
| theoretical pore volume/cm <sup>3</sup> /g | 0.138 <sup>a</sup>                                                                            | 0.141 <sup>a</sup>                                                                                                 |
| refinement parameters                      | R <sub>1</sub> = 0.1415, wR <sub>2</sub> = 0.3556                                             | R <sub>p</sub> = 0.0112, R <sub>wp</sub> = 0.0135                                                                  |

<sup>a</sup> Calculated on the basis of the MOF crystal structures using PLATON software.

**Table S2.** Comparison of the Crystallographic and Refinement Parameters for Guest-free ELM-12<sup>#</sup> and C<sub>2</sub>D<sub>2</sub>-loaded ELM-12.

<sup>#</sup> Kondo, A. et al. *J. Am. Chem. Soc.*, **2007**, 129, 12362.

†
